# Supplementary material for: Morphology control of calcium phosphate by mineralization on the β-sheet peptide template
Source: Royal Society of Chemistry journal article supplement (doi:10.1039/c0cc02012e), 2010-01-01

**Electric Supplementary Information for:**  
**Morphology Control of Calcium Phosphate by Mineralization**  
**on the  $\beta$ -sheet Peptide Template**

Takayuki Nonoyama,<sup>a</sup> Masayoshi Tanaka,<sup>a</sup> Takatoshi Kinoshita,<sup>a</sup> Fukue  
Nagata,<sup>b</sup> Kimiyasu Sato<sup>b</sup> and Katsuya Kato<sup>\*b</sup>

<sup>a</sup> *Department of Frontier Materials, Nagoya Institute of Technology, Gokiso-cho,  
Showa-ku, Nagoya, Aichi, Japan*

*E-mail: kinoshita.takatoshi@nitech.ac.jp*

<sup>b</sup> *National Institute of Advanced Industrial Science and Technology, 2266-98  
Anagahora, Shimo-Shidami moriyama-ku, Nagoya, Aichi, Japan.*

*E-mail: katsuya-kato@aist.go.jp*

|                                                                                                          |          |
|----------------------------------------------------------------------------------------------------------|----------|
| <b>S1. Peptide synthesis by Fmoc solid phase peptide synthesis.....</b>                                  | <b>2</b> |
| <b>S2. <math>\beta</math>-sheet peptide – PEG copolymer (LE)<sub>8</sub>-PEG<sub>70</sub> model.....</b> | <b>2</b> |
| <b>S3. Contact angle measurement.....</b>                                                                | <b>3</b> |
| <b>S4. XPS spectrum of precipitate on peptide scaffold.....</b>                                          | <b>4</b> |
| <b>S5. AFM image of calcium phosphate nano fiber.....</b>                                                | <b>5</b> |

## S1. Peptide synthesis by Fmoc solid phase peptide synthesis

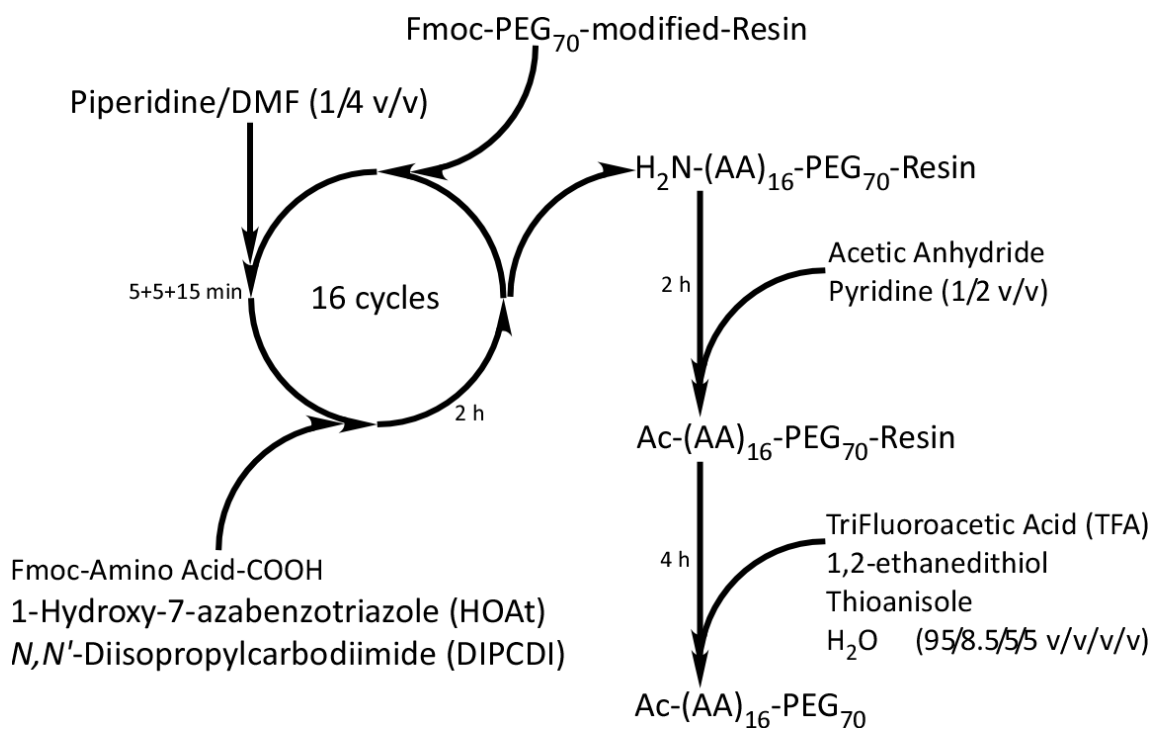

## S2. $\beta$ -sheet peptide – PEG copolymer (LE)<sub>8</sub>-PEG<sub>70</sub> model

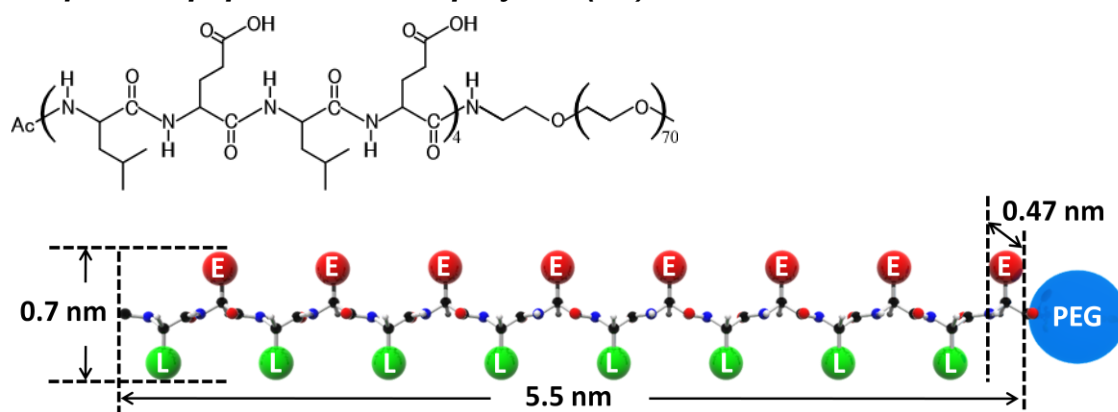

### S3. Contact angle measurement

**Mica surface**

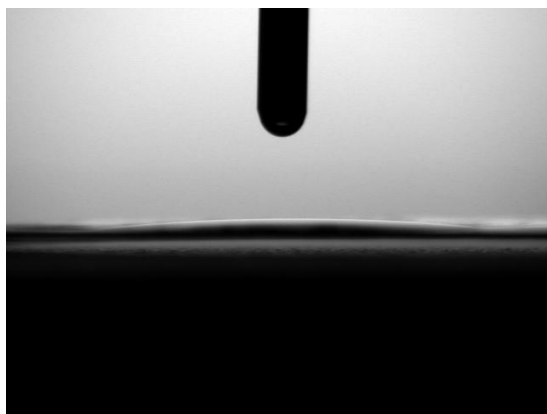

**(LE)<sub>8</sub>-PEG<sub>70</sub> LB monolayer  
(Leucine is surface side)**

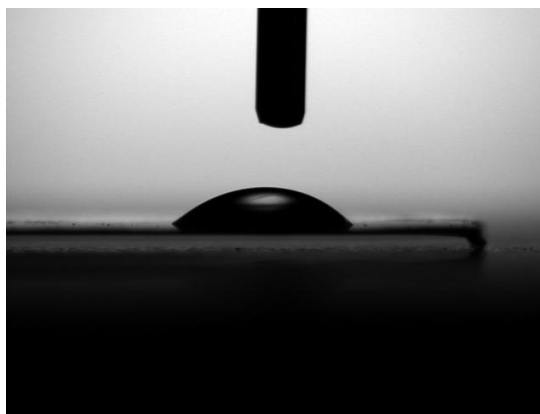

**(LE)<sub>8</sub>-PEG<sub>70</sub> LB monolayer  
(Glutamic acid is surface side)**

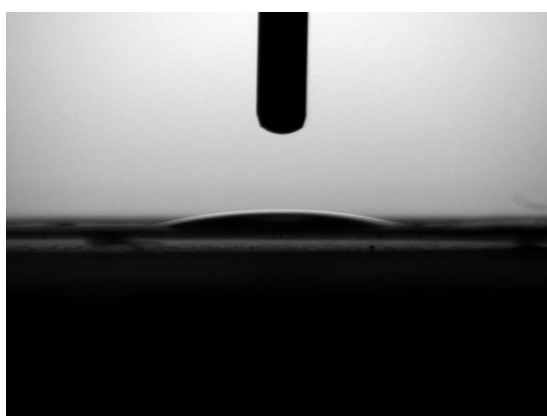

**Adsorption monolayer**

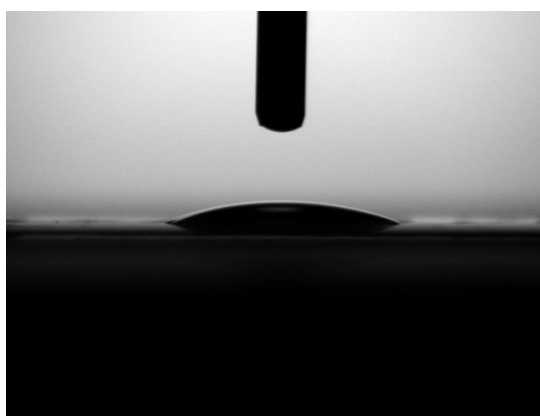

| Surface                                                                              | Contact angle [deg] |
|--------------------------------------------------------------------------------------|---------------------|
| Mica surface                                                                         | 8.1                 |
| (LE) <sub>8</sub> -PEG <sub>70</sub> LB monolayer<br>(Leucine is surface side)       | 43.5                |
| (LE) <sub>8</sub> -PEG <sub>70</sub> LB monolayer<br>(Glutamic acid is surface side) | 13.9                |
| Adsorption monolayer                                                                 | 17.6                |

The Langmuir-Blodgett method can control a molecular direction precisely. The two types of the (LE)<sub>8</sub>-PEG<sub>70</sub> monolayer of the leucine surface (hydrophobic side) and the glutamic acid surface (hydrophilic side) were prepared, and an adsorption film was compared with the LB films. A contact angle value of the adsorption film was similar to the glutamic acid surface one.

#### S4. XPS spectrum of precipitate on peptide scaffold

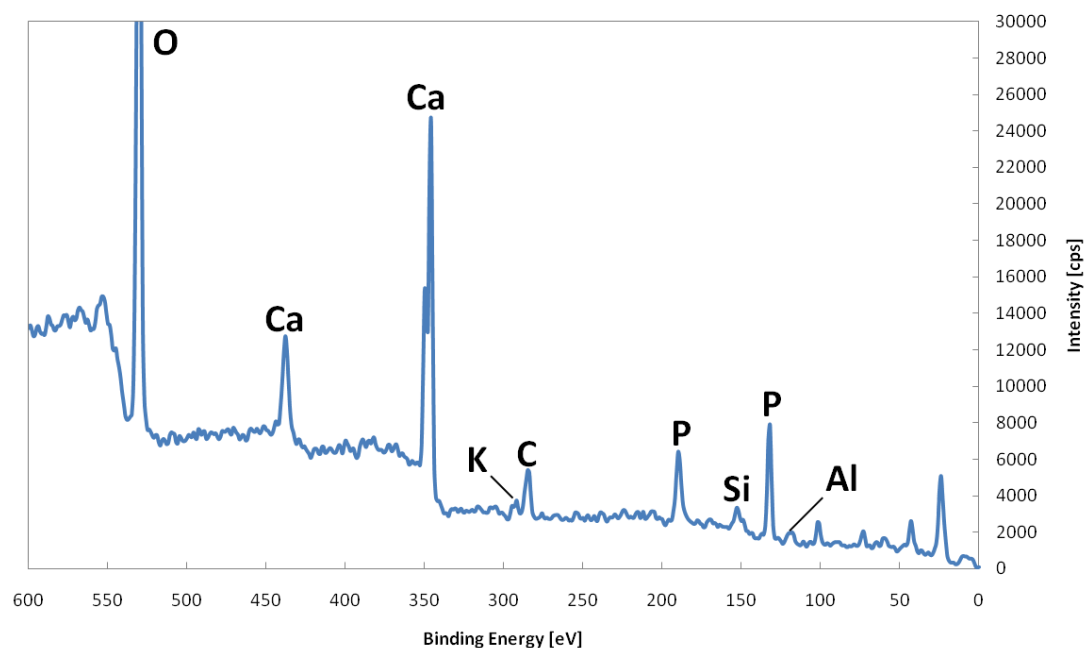

Mica :  $\text{KAl}_2(\text{Si}_3\text{Al})\text{O}_{10}(\text{OH})_2$

| Element | Atom [%] |
|---------|----------|
| K       | 15.0     |
| Al      | 43.9     |
| Si      | 41.1     |

CaP

| Element | Atom [%] |
|---------|----------|
| Ca      | 54.2     |
| P       | 45.8     |

| Element | Binding Energy                                                                            |
|---------|-------------------------------------------------------------------------------------------|
| C       | 284(1.00) $1\text{S}_{1/2}$                                                               |
| O       | 532(2.93) $1\text{S}_{1/2}$                                                               |
| Al      | 118(.753) $2\text{S}_{1/2}$                                                               |
| Si      | 149(.955) $2\text{S}_{1/2}$                                                               |
| P       | 189(1.18) $2\text{S}_{1/2}$<br>135(.789) $2\text{P}_{3/2}$                                |
| K       | 294(2.62) $2\text{P}_{3/2}$                                                               |
| Ca      | 438(2.59) $2\text{S}_{1/2}$<br>350(1.72) $2\text{P}_{1/2}$<br>347(3.35) $2\text{P}_{3/2}$ |

**S5. AFM image of calcium phosphate nanofiber**

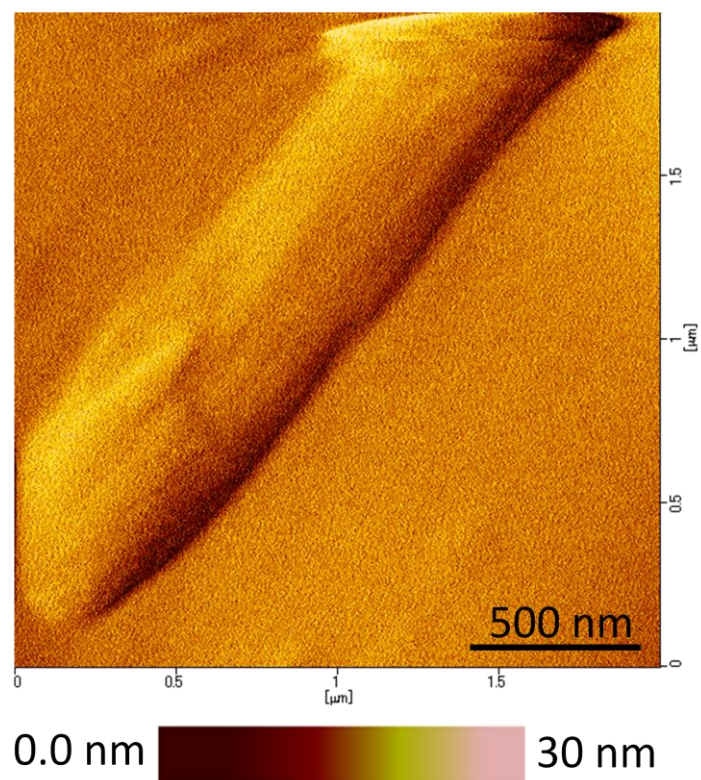

Supplement: c0cc02012e.pdf [file c0cc02012e.pdf]
